# Supplementary material
Source: Springer Nature journal article supplement (https://www.springermedizin.de/resource/supplementary/12882_2011_239_MOESM1_ESM.pdf/9453326)

# ROC curve analysis

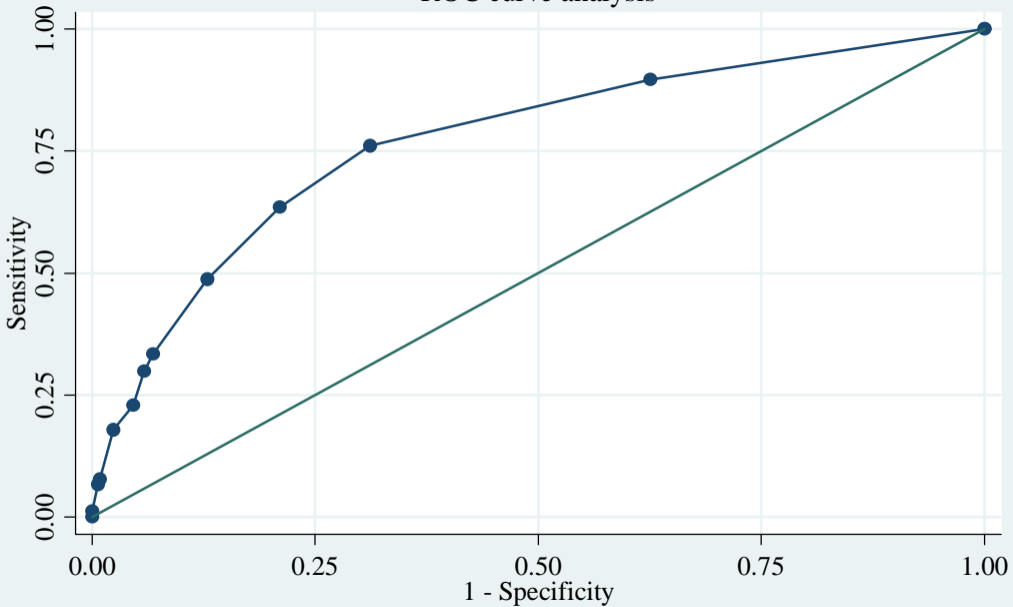

Area under ROC curve = 0.7699

Supplement: MOESM1 [file 9453326]
